# Supplementary material for: Protease-associated import systems are widespread in Gram-negative bacteria
Source: PLoS Genet. 2019 Oct 15;15(10):e1008435. doi: 10.1371/journal.pgen.1008435 (PMC6793856; doi:10.1371/journal.pgen.1008435)
Supplement: S3 Table — (XLSX) [file pgen.1008435.s010.xlsx]

## Sheet: YddB Dali Output
PDB ID	Z-score	rmsd	lali	nres	%id	Description
4zgv	42.2	2.2	726	809	27	Ferredoxin Receptor FusA
5fp2	30.6	2.3	486	499	17	Ferric Enterobactin Receptor PirA
2gsk	30.5	3.1	538	590	15	Vitamin B12 Transporter BtuB
2hdi	29.7	2.6	541	598	15	Catecholate receptor Cir
5m9b	28.8	3.2	567	707	15	Ferric Enterobactin Receptor PfeA
3fhh	28.3	2.9	545	621	15	Heme/Hemoglobin Transporter ShuA
1kmo	27.7	3.4	560	661	14	Iron-Citrate Transporter FecA
5fr8	26.7	3.1	567	707	17	Catecholate receptor PirA
4epa	26.5	3.7	551	632	12	Pesticin Receptor FyuA
3qlb	26.2	4.2	558	673	13	Enantio-Pyochelin Receptor
2o5p	25.7	3.9	559	772	13	Ferripyoverdine Transporter FpvA
3efm	25.7	3.7	508	572	13	Ferric Alcaligin Transporter FauA
3v89	25.6	3.7	586	853	11	Transferrin Receptor TpbA
4aip	25.5	3.1	543	665	14	Fe Transporter FrpB
5fp1	25.4	4.7	548	701	14	Catecholate Transporter PiuA
5fok	25.1	4.5	527	656	13	Catecholate Transporter PiuA
5fq6	25.1	3.8	609	948	14	Polysacharide Transporter SusC
1xkw	25.1	3.8	541	655	12	Pyochelin Transporter FptA
6bpm	24.8	4.6	546	711	14	Catecholate Transporter Fiu
3csl	24.7	3.4	555	753	12	Heme/Hemophore Receptor HasR
1fi1	24.3	4.5	557	707	12	Ferrichrome Transporter FhuA
6h7f	24.3	4.2	542	674	14	Preacinetobactin Transporter BauA
4rdr	24	3.8	546	706	10	Zinc Transporter ZnuA
5t4y	13.6	3.7	499	807	12	Putative Peptide Transporter
